# Supplementary material for: Informativeness of the Long-Term Average Spectral Characteristics of the Bare Soil Surface for the Detection of Soil Cover Degradation with the Neural Network Filtering of Remote Sensing Data
Source: MDPI journal article supplement (doi:10.3390/rs15010124), 2022-12-26
Supplement: s1 [file s1]

**Table S1.** RSD Landsat for study area found in the archives.

| Landsat scene<br>(year_month<br>day_satellite_path row) |                      | Landsat scene<br>(year_month<br>day_satellite_path row) |                      |
|---------------------------------------------------------|----------------------|---------------------------------------------------------|----------------------|
| 1                                                       | LT05_19840424_173026 | 277                                                     | LT05_20010712_173026 |
| 2                                                       | LT05_19840510_173026 | 278                                                     | LT05_20010728_173026 |
| 3                                                       | LT05_19840526_173026 | 279                                                     | LE07_20010805_173026 |
| 4                                                       | LT05_19840627_173026 | 280                                                     | LT05_20010813_173026 |
| 5                                                       | LT05_19840830_173026 | 281                                                     | LE07_20010821_173026 |
| 6                                                       | LT05_19850310_173026 | 282                                                     | LE07_20010922_173026 |
| 7                                                       | LT05_19850513_173026 | 283                                                     | LE07_20011008_173026 |
| 8                                                       | LT05_19850529_173026 | 284                                                     | LE07_20011109_173026 |
| 9                                                       | LT05_19850614_173026 | 285                                                     | LE07_20011125_173026 |
| 10                                                      | LT05_19850630_173026 | 286                                                     | LT05_20011203_173026 |
| 11                                                      | LT05_19850716_173026 | 287                                                     | LE07_20011211_173026 |
| 12                                                      | LT05_19850801_173026 | 288                                                     | LE07_20011227_173026 |
| 13                                                      | LT05_19850817_173026 | 289                                                     | LT05_20020104_173026 |
| 14                                                      | LT05_19850918_173026 | 290                                                     | LE07_20020128_173026 |
| 15                                                      | LT05_19851020_173026 | 291                                                     | LT05_20020221_173026 |
| 16                                                      | LT05_19851105_173026 | 292                                                     | LT05_20020309_173026 |
| 17                                                      | LT05_19851121_173026 | 293                                                     | LE07_20020317_173026 |
| 18                                                      | LT05_19860108_173026 | 294                                                     | LT05_20020325_173026 |
| 19                                                      | LT05_19860313_173026 | 295                                                     | LT05_20020426_173026 |
| 20                                                      | LT05_19860329_173026 | 296                                                     | LE07_20020520_173026 |
| 21                                                      | LT05_19860414_173026 | 297                                                     | LT05_20020613_173026 |
| 22                                                      | LT05_19860430_173026 | 298                                                     | LE07_20020621_173026 |
| 23                                                      | LT05_19860516_173026 | 299                                                     | LT05_20020629_173026 |
| 24                                                      | LT05_19860601_173026 | 300                                                     | LE07_20020707_173026 |
| 25                                                      | LT05_19860617_173026 | 301                                                     | LE07_20020824_173026 |
| 26                                                      | LT05_19860703_173026 | 302                                                     | LE07_20020909_173026 |
| 27                                                      | LT05_19860719_173026 | 303                                                     | LE07_20020925_173026 |
| 28                                                      | LT05_19860804_173026 | 304                                                     | LE07_20021011_173026 |
| 29                                                      | LT05_19860820_173026 | 305                                                     | LE07_20021027_173026 |
| 30                                                      | LT05_19861007_173026 | 306                                                     | LE07_20021214_173026 |
| 31                                                      | LT05_19861023_173026 | 307                                                     | LE07_20030216_173026 |
| 32                                                      | LT05_19861108_173026 | 308                                                     | LE07_20030304_173026 |
| 33                                                      | LT05_19861210_173026 | 309                                                     | LE07_20030421_173026 |
| 34                                                      | LT05_19870111_173026 | 310                                                     | LE07_20030507_173026 |
| 35                                                      | LT05_19870212_173026 | 311                                                     | LE07_20030523_173026 |
| 36                                                      | LT05_19870316_173026 | 312                                                     | LT05_20030718_173026 |
| 37                                                      | LT05_19870401_173026 | 313                                                     | LT05_20030803_173026 |
| 38                                                      | LT05_19870503_173026 | 314                                                     | LT05_20030819_173026 |
| 39                                                      | LT05_19870519_173026 | 315                                                     | LT05_20030904_173026 |
| 40                                                      | LT05_19870706_173026 | 316                                                     | LT05_20030920_173026 |
| 41                                                      | LT05_19870807_173026 | 317                                                     | LT05_20040126_173026 |
| 42                                                      | LT05_19870823_173026 | 318                                                     | LT05_20040211_173026 |
| 43                                                      | LT05_19870908_173026 | 319                                                     | LT05_20040618_173026 |

| Landsat scene<br>(year_month<br>day_satellite_path row) |                      | Landsat scene<br>(year_month<br>day_satellite_path row) |                      |
|---------------------------------------------------------|----------------------|---------------------------------------------------------|----------------------|
| 44                                                      | LT05_19871010_173026 | 320                                                     | LT05_20040704_173026 |
| 45                                                      | LT05_19871026_173026 | 321                                                     | LT05_20040720_173026 |
| 46                                                      | LT05_19871111_173026 | 322                                                     | LT05_20040805_173026 |
| 47                                                      | LT05_19871127_173026 | 323                                                     | LT05_20040821_173026 |
| 48                                                      | LT04_19871205_173026 | 324                                                     | LT05_20040922_173026 |
| 49                                                      | LT05_19871213_173026 | 325                                                     | LT05_20041211_173026 |
| 50                                                      | LT05_19880130_173026 | 326                                                     | LT05_20050213_173026 |
| 51                                                      | LT05_19880215_173026 | 327                                                     | LT05_20050301_173026 |
| 52                                                      | LT05_19880505_173026 | 328                                                     | LT05_20050317_173026 |
| 53                                                      | LT05_19880606_173026 | 329                                                     | LT05_20050504_173026 |
| 54                                                      | LT04_19880614_173026 | 330                                                     | LT05_20050605_173026 |
| 55                                                      | LT05_19880622_173026 | 331                                                     | LT05_20050808_173026 |
| 56                                                      | LT04_19880630_173026 | 332                                                     | LT05_20050824_173026 |
| 57                                                      | LT05_19880708_173026 | 333                                                     | LT05_20050909_173026 |
| 58                                                      | LT04_19880716_173026 | 334                                                     | LT05_20050925_173026 |
| 59                                                      | LT05_19880724_173026 | 335                                                     | LT05_20060405_173026 |
| 60                                                      | LT04_19880801_173026 | 336                                                     | LT05_20060421_173026 |
| 61                                                      | LT05_19880809_173026 | 337                                                     | LT05_20060507_173026 |
| 62                                                      | LT04_19880817_173026 | 338                                                     | LT05_20060523_173026 |
| 63                                                      | LT05_19880825_173026 | 339                                                     | LT05_20060608_173026 |
| 64                                                      | LT05_19880910_173026 | 340                                                     | LT05_20060624_173026 |
| 65                                                      | LT05_19881012_173026 | 341                                                     | LT05_20060710_173026 |
| 66                                                      | LT04_19881020_173026 | 342                                                     | LT05_20060726_173026 |
| 67                                                      | LT05_19881028_173026 | 343                                                     | LT05_20060811_173026 |
| 68                                                      | LT04_19881105_173026 | 344                                                     | LT05_20060827_173026 |
| 69                                                      | LT05_19881113_173026 | 345                                                     | LT05_20060912_173026 |
| 70                                                      | LT05_19881129_173026 | 346                                                     | LT05_20060928_173026 |
| 71                                                      | LT05_19881231_173026 | 347                                                     | LT05_20061014_173026 |
| 72                                                      | LT05_19890321_173026 | 348                                                     | LT05_20070102_173026 |
| 73                                                      | LT05_19890406_173026 | 349                                                     | LT05_20070118_173026 |
| 74                                                      | LT05_19890422_173026 | 350                                                     | LT05_20070203_173026 |
| 75                                                      | LT05_19890508_173026 | 351                                                     | LT05_20070323_173026 |
| 76                                                      | LT05_19890524_173026 | 352                                                     | LT05_20070526_173026 |
| 77                                                      | LT05_19890609_173026 | 353                                                     | LT05_20070611_173026 |
| 78                                                      | LT05_19890625_173026 | 354                                                     | LT05_20070713_173026 |
| 79                                                      | LT04_19890703_173026 | 355                                                     | LT05_20070729_173026 |
| 80                                                      | LT05_19890711_173026 | 356                                                     | LT05_20070814_173026 |
| 81                                                      | LT04_19890719_173026 | 357                                                     | LT05_20070830_173026 |
| 82                                                      | LT04_19890804_173026 | 358                                                     | LT05_20070915_173026 |
| 83                                                      | LT05_19890812_173026 | 359                                                     | LT05_20071001_173026 |
| 84                                                      | LT04_19890820_173026 | 360                                                     | LT05_20080309_173026 |
| 85                                                      | LT05_19890828_173026 | 361                                                     | LT05_20080731_173026 |
| 86                                                      | LT04_19890905_173026 | 362                                                     | LT05_20080816_173026 |
| 87                                                      | LT04_19890921_173026 | 363                                                     | LT05_20080901_173026 |
| 88                                                      | LT05_19890929_173026 | 364                                                     | LT05_20090312_173026 |

| Landsat scene<br>(year_month<br>day_satellite_path row) |                      | Landsat scene<br>(year_month<br>day_satellite_path row) |                      |
|---------------------------------------------------------|----------------------|---------------------------------------------------------|----------------------|
| 89                                                      | LT05_19891015_173026 | 365                                                     | LT05_20090429_173026 |
| 90                                                      | LT05_19891031_173026 | 366                                                     | LT05_20090515_173026 |
| 91                                                      | LT05_19891116_173026 | 367                                                     | LT05_20090531_173026 |
| 92                                                      | LT05_19900220_173026 | 368                                                     | LT05_20090616_173026 |
| 93                                                      | LT05_19900308_173026 | 369                                                     | LT05_20090702_173026 |
| 94                                                      | LT05_19900324_173026 | 370                                                     | LT05_20090718_173026 |
| 95                                                      | LT05_19900409_173026 | 371                                                     | LT05_20090803_173026 |
| 96                                                      | LT05_19900511_173026 | 372                                                     | LT05_20090819_173026 |
| 97                                                      | LT05_19900612_173026 | 373                                                     | LT05_20090920_173026 |
| 98                                                      | LT05_19900714_173026 | 374                                                     | LT05_20091006_173026 |
| 99                                                      | LT05_19900730_173026 | 375                                                     | LT05_20091022_173026 |
| 100                                                     | LT05_19900815_173026 | 376                                                     | LT05_20091209_173026 |
| 101                                                     | LT05_19900916_173026 | 377                                                     | LT05_20100126_173026 |
| 102                                                     | LT05_19901221_173026 | 378                                                     | LT05_20100211_173026 |
| 103                                                     | LT05_19910223_173026 | 379                                                     | LT05_20100227_173026 |
| 104                                                     | LT05_19910412_173026 | 380                                                     | LT05_20100315_173026 |
| 105                                                     | LT05_19910428_173026 | 381                                                     | LT05_20100416_173026 |
| 106                                                     | LT05_19910514_173026 | 382                                                     | LT05_20100502_173026 |
| 107                                                     | LT05_19910530_173026 | 383                                                     | LT05_20100518_173026 |
| 108                                                     | LT05_19910615_173026 | 384                                                     | LT05_20100603_173026 |
| 109                                                     | LT05_19910701_173026 | 385                                                     | LT05_20100619_173026 |
| 110                                                     | LT05_19910717_173026 | 386                                                     | LT05_20100705_173026 |
| 111                                                     | LT05_19910802_173026 | 387                                                     | LT05_20100721_173026 |
| 112                                                     | LT05_19910818_173026 | 388                                                     | LT05_20100806_173026 |
| 113                                                     | LT05_19910903_173026 | 389                                                     | LT05_20100822_173026 |
| 114                                                     | LT05_19910919_173026 | 390                                                     | LT05_20100907_173026 |
| 115                                                     | LT05_19911005_173026 | 391                                                     | LT05_20100923_173026 |
| 116                                                     | LT05_19911021_173026 | 392                                                     | LT05_20101009_173026 |
| 117                                                     | LT05_19911106_173026 | 393                                                     | LT05_20101025_173026 |
| 118                                                     | LT05_19920329_173026 | 394                                                     | LT05_20101110_173026 |
| 119                                                     | LT05_19920414_173026 | 395                                                     | LT05_20101126_173026 |
| 120                                                     | LT05_19920617_173026 | 396                                                     | LT05_20110302_173026 |
| 121                                                     | LT04_19920625_173026 | 397                                                     | LT05_20110403_173026 |
| 122                                                     | LT04_19920711_173026 | 398                                                     | LT05_20110419_173026 |
| 123                                                     | LT05_19920804_173026 | 399                                                     | LT05_20110505_173026 |
| 124                                                     | LT05_19920820_173026 | 400                                                     | LT05_20110521_173026 |
| 125                                                     | LT05_19920905_173026 | 401                                                     | LT05_20110606_173026 |
| 126                                                     | LT05_19921007_173026 | 402                                                     | LT05_20110622_173026 |
| 127                                                     | LT05_19921124_173026 | 403                                                     | LT05_20110708_173026 |
| 128                                                     | LT05_19930127_173026 | 404                                                     | LT05_20110724_173026 |
| 129                                                     | LT05_19930212_173026 | 405                                                     | LT05_20110809_173026 |
| 130                                                     | LT05_19930401_173026 | 406                                                     | LT05_20110825_173026 |
| 131                                                     | LT05_19930503_173026 | 407                                                     | LT05_20110910_173026 |
| 132                                                     | LT05_19930604_173026 | 408                                                     | LC08_20130326_173026 |
| 133                                                     | LT05_19930620_173026 | 409                                                     | LC08_20130424_173026 |

| Landsat scene<br>(year_month<br>day_satellite_path row) |                      | Landsat scene<br>(year_month<br>day_satellite_path row) |                      |
|---------------------------------------------------------|----------------------|---------------------------------------------------------|----------------------|
| 134                                                     | LT05_19930706_173026 | 410                                                     | LC08_20130611_173026 |
| 135                                                     | LT05_19930722_173026 | 411                                                     | LC08_20130627_173026 |
| 136                                                     | LT05_19930807_173026 | 412                                                     | LC08_20130713_173026 |
| 137                                                     | LT05_19930823_173026 | 413                                                     | LC08_20130729_173026 |
| 138                                                     | LT05_19930908_173026 | 414                                                     | LC08_20130814_173026 |
| 139                                                     | LT05_19930924_173026 | 415                                                     | LC08_20130830_173026 |
| 140                                                     | LT05_19931010_173026 | 416                                                     | LC08_20130915_173026 |
| 141                                                     | LT05_19931111_173026 | 417                                                     | LC08_20131001_173026 |
| 142                                                     | LT05_19931127_173026 | 418                                                     | LC08_20131017_173026 |
| 143                                                     | LT05_19940215_173026 | 419                                                     | LC08_20131102_173026 |
| 144                                                     | LT05_19940319_173026 | 420                                                     | LC08_20140121_173026 |
| 145                                                     | LT05_19940404_173026 | 421                                                     | LC08_20140222_173026 |
| 146                                                     | LT05_19940420_173026 | 422                                                     | LC08_20140310_173026 |
| 147                                                     | LT05_19940506_173026 | 423                                                     | LC08_20140326_173026 |
| 148                                                     | LT05_19940522_173026 | 424                                                     | LC08_20140411_173026 |
| 149                                                     | LT05_19940623_173026 | 425                                                     | LC08_20140427_173026 |
| 150                                                     | LT05_19940709_173026 | 426                                                     | LC08_20140513_173026 |
| 151                                                     | LT05_19940725_173026 | 427                                                     | LC08_20140529_173026 |
| 152                                                     | LT05_19940810_173026 | 428                                                     | LC08_20140614_173026 |
| 153                                                     | LT05_19940826_173026 | 429                                                     | LC08_20140630_173026 |
| 154                                                     | LT05_19940911_173026 | 430                                                     | LC08_20140716_173026 |
| 155                                                     | LT05_19940927_173026 | 431                                                     | LC08_20140801_173026 |
| 156                                                     | LT05_19941013_173026 | 432                                                     | LC08_20140817_173026 |
| 157                                                     | LT05_19941029_173026 | 433                                                     | LC08_20140902_173026 |
| 158                                                     | LT05_19941114_173026 | 434                                                     | LC08_20140918_173026 |
| 159                                                     | LT05_19950117_173026 | 435                                                     | LC08_20141004_173026 |
| 160                                                     | LT05_19950407_173026 | 436                                                     | LC08_20141020_173026 |
| 161                                                     | LT05_19950423_173026 | 437                                                     | LC08_20141105_173026 |
| 162                                                     | LT05_19950509_173026 | 438                                                     | LC08_20141121_173026 |
| 163                                                     | LT05_19950525_173026 | 439                                                     | LC08_20141207_173026 |
| 164                                                     | LT05_19950610_173026 | 440                                                     | LC08_20150108_173026 |
| 165                                                     | LT05_19950626_173026 | 441                                                     | LC08_20150124_173026 |
| 166                                                     | LT05_19950712_173026 | 442                                                     | LC08_20150225_173026 |
| 167                                                     | LT05_19950728_173026 | 443                                                     | LC08_20150313_173026 |
| 168                                                     | LT05_19950813_173026 | 444                                                     | LC08_20150414_173026 |
| 169                                                     | LT05_19950829_173026 | 445                                                     | LC08_20150430_173026 |
| 170                                                     | LT05_19950914_173026 | 446                                                     | LC08_20150516_173026 |
| 171                                                     | LT05_19950930_173026 | 447                                                     | LC08_20150601_173026 |
| 172                                                     | LT05_19951016_173026 | 448                                                     | LC08_20150617_173026 |
| 173                                                     | LT05_19951203_173026 | 449                                                     | LC08_20150703_173026 |
| 174                                                     | LT05_19960324_173026 | 450                                                     | LC08_20150719_173026 |
| 175                                                     | LT05_19960409_173026 | 451                                                     | LC08_20150804_173026 |
| 176                                                     | LT05_19960425_173026 | 452                                                     | LC08_20150820_173026 |
| 177                                                     | LT05_19960511_173026 | 453                                                     | LC08_20150905_173026 |
| 178                                                     | LT05_19960527_173026 | 454                                                     | LC08_20150921_173026 |

| Landsat scene<br>(year_month<br>day_satellite_path row) |                      | Landsat scene<br>(year_month<br>day_satellite_path row) |                      |
|---------------------------------------------------------|----------------------|---------------------------------------------------------|----------------------|
| 179                                                     | LT05_19960612_173026 | 455                                                     | LC08_20151007_173026 |
| 180                                                     | LT05_19960628_173026 | 456                                                     | LC08_20151108_173026 |
| 181                                                     | LT05_19960714_173026 | 457                                                     | LC08_20151124_173026 |
| 182                                                     | LT05_19960730_173026 | 458                                                     | LC08_20151210_173026 |
| 183                                                     | LT05_19960815_173026 | 459                                                     | LC08_20160111_173026 |
| 184                                                     | LT05_19960831_173026 | 460                                                     | LC08_20160331_173026 |
| 185                                                     | LT05_19960916_173026 | 461                                                     | LC08_20160502_173026 |
| 186                                                     | LT05_19961002_173026 | 462                                                     | LC08_20160518_173026 |
| 187                                                     | LT05_19961018_173026 | 463                                                     | LC08_20160603_173026 |
| 188                                                     | LT05_19970207_173026 | 464                                                     | LC08_20160619_173026 |
| 189                                                     | LT05_19970311_173026 | 465                                                     | LC08_20160705_173026 |
| 190                                                     | LT05_19970428_173026 | 466                                                     | LC08_20160721_173026 |
| 191                                                     | LT05_19970514_173026 | 467                                                     | LC08_20160806_173026 |
| 192                                                     | LT05_19970530_173026 | 468                                                     | LC08_20160822_173026 |
| 193                                                     | LT05_19970615_173026 | 469                                                     | LC08_20160907_173026 |
| 194                                                     | LT05_19970701_173026 | 470                                                     | LC08_20160923_173026 |
| 195                                                     | LT05_19970802_173026 | 471                                                     | LC08_20161009_173026 |
| 196                                                     | LT05_19970818_173026 | 472                                                     | LC08_20161025_173026 |
| 197                                                     | LT05_19970903_173026 | 473                                                     | LC08_20161126_173026 |
| 198                                                     | LT05_19971005_173026 | 474                                                     | LC08_20170129_173026 |
| 199                                                     | LT05_19971106_173026 | 475                                                     | LC08_20170214_173026 |
| 200                                                     | LT05_19980125_173026 | 476                                                     | LC08_20170302_173026 |
| 201                                                     | LT05_19980226_173026 | 477                                                     | LC08_20170318_173026 |
| 202                                                     | LT05_19980330_173026 | 478                                                     | LC08_20170403_173026 |
| 203                                                     | LT05_19980415_173026 | 479                                                     | LC08_20170505_173026 |
| 204                                                     | LT05_19980501_173026 | 480                                                     | LC08_20170521_173026 |
| 205                                                     | LT05_19980517_173026 | 481                                                     | LC08_20170606_173026 |
| 206                                                     | LT05_19980602_173026 | 482                                                     | LC08_20170622_173026 |
| 207                                                     | LT05_19980618_173026 | 483                                                     | LC08_20170708_173026 |
| 208                                                     | LT05_19980704_173026 | 484                                                     | LC08_20170724_173026 |
| 209                                                     | LT05_19980720_173026 | 485                                                     | LC08_20170809_173026 |
| 210                                                     | LT05_19980805_173026 | 486                                                     | LC08_20170825_173026 |
| 211                                                     | LT05_19980821_173026 | 487                                                     | LC08_20170910_173026 |
| 212                                                     | LT05_19980906_173026 | 488                                                     | LC08_20170926_173026 |
| 213                                                     | LT05_19980922_173026 | 489                                                     | LC08_20171012_173026 |
| 214                                                     | LT05_19981008_173026 | 490                                                     | LC08_20171113_173026 |
| 215                                                     | LT05_19981024_173026 | 491                                                     | LC08_20180116_173026 |
| 216                                                     | LT05_19981109_173026 | 492                                                     | LC08_20180217_173026 |
| 217                                                     | LT05_19981125_173026 | 493                                                     | LC08_20180406_173026 |
| 218                                                     | LT05_19981227_173026 | 494                                                     | LC08_20180422_173026 |
| 219                                                     | LT05_19990112_173026 | 495                                                     | LC08_20180508_173026 |
| 220                                                     | LT05_19990128_173026 | 496                                                     | LC08_20180524_173026 |
| 221                                                     | LT05_19990317_173026 | 497                                                     | LC08_20180609_173026 |
| 222                                                     | LT05_19990418_173026 | 498                                                     | LC08_20180625_173026 |
| 223                                                     | LT05_19990504_173026 | 499                                                     | LC08_20180711_173026 |

| Landsat scene<br>(year_month<br>day_satellite_path row) |                      | Landsat scene<br>(year_month<br>day_satellite_path row) |                      |
|---------------------------------------------------------|----------------------|---------------------------------------------------------|----------------------|
| 224                                                     | LT05_19990605_173026 | 500                                                     | LC08_20180727_173026 |
| 225                                                     | LT05_19990621_173026 | 501                                                     | LC08_20180812_173026 |
| 226                                                     | LT05_19990707_173026 | 502                                                     | LC08_20180828_173026 |
| 227                                                     | LE07_19990715_173026 | 503                                                     | LC08_20180913_173026 |
| 228                                                     | LT05_19990723_173026 | 504                                                     | LC08_20180929_173026 |
| 229                                                     | LE07_19990731_173026 | 505                                                     | LC08_20181015_173026 |
| 230                                                     | LT05_19990808_173026 | 506                                                     | LC08_20181031_173026 |
| 231                                                     | LE07_19990816_173026 | 507                                                     | LC08_20181116_173026 |
| 232                                                     | LT05_19990824_173026 | 508                                                     | LC08_20181218_173026 |
| 233                                                     | LE07_19990901_173026 | 509                                                     | LC08_20190204_173026 |
| 234                                                     | LT05_19990909_173026 | 510                                                     | LC08_20190220_173026 |
| 235                                                     | LE07_19990917_173026 | 511                                                     | LC08_20190308_173026 |
| 236                                                     | LT05_19990925_173026 | 512                                                     | LC08_20190324_173026 |
| 237                                                     | LE07_19991003_173026 | 513                                                     | LC08_20190409_173026 |
| 238                                                     | LT05_19991011_173026 | 514                                                     | LC08_20190425_173026 |
| 239                                                     | LE07_19991104_173026 | 515                                                     | LC08_20190511_173026 |
| 240                                                     | LT05_19991128_173026 | 516                                                     | LC08_20190527_173026 |
| 241                                                     | LE07_19991206_173026 | 517                                                     | LC08_20190612_173026 |
| 242                                                     | LT05_19991230_173026 | 518                                                     | LC08_20190628_173026 |
| 243                                                     | LE07_20000107_173026 | 519                                                     | LC08_20190714_173026 |
| 244                                                     | LT05_20000115_173026 | 520                                                     | LC08_20190730_173026 |
| 245                                                     | LE07_20000123_173026 | 521                                                     | LC08_20190815_173026 |
| 246                                                     | LE07_20000224_173026 | 522                                                     | LC08_20190831_173026 |
| 247                                                     | LT05_20000303_173026 | 523                                                     | LC08_20190916_173026 |
| 248                                                     | LE07_20000311_173026 | 524                                                     | LC08_20191002_173026 |
| 249                                                     | LE07_20000428_173026 | 525                                                     | LC08_20191018_173026 |
| 250                                                     | LT05_20000506_173026 | 526                                                     | LC08_20191103_173026 |
| 251                                                     | LE07_20000530_173026 | 527                                                     | LC08_20200207_173026 |
| 252                                                     | LE07_20000615_173026 | 528                                                     | LC08_20200310_173026 |
| 253                                                     | LE07_20000701_173026 | 529                                                     | LC08_20200326_173026 |
| 254                                                     | LT05_20000709_173026 | 530                                                     | LC08_20200513_173026 |
| 255                                                     | LE07_20000717_173026 | 531                                                     | LC08_20200529_173026 |
| 256                                                     | LT05_20000725_173026 | 532                                                     | LC08_20200614_173026 |
| 257                                                     | LE07_20000802_173026 | 533                                                     | LC08_20200630_173026 |
| 258                                                     | LT05_20000810_173026 | 534                                                     | LC08_20200716_173026 |
| 259                                                     | LE07_20000818_173026 | 535                                                     | LC08_20200817_173026 |
| 260                                                     | LT05_20000826_173026 | 536                                                     | LC08_20200902_173026 |
| 261                                                     | LE07_20000903_173026 | 537                                                     | LC08_20200918_173026 |
| 262                                                     | LT05_20000911_173026 | 538                                                     | LC08_20201004_173026 |
| 263                                                     | LE07_20001005_173026 | 539                                                     | LC08_20201020_173026 |
| 264                                                     | LT05_20001013_173026 | 540                                                     | LC08_20201121_173026 |
| 265                                                     | LT05_20001029_173026 | 541                                                     | LC08_20201207_173026 |
| 266                                                     | LT05_20001114_173026 | 542                                                     | LC08_20210108_173026 |
| 267                                                     | LE07_20001208_173026 | 543                                                     | LC08_20210313_173026 |
| 268                                                     | LE07_20010125_173026 | 544                                                     | LC08_20210329_173026 |

|     | <b>Landsat scene<br/>(year_month<br/>day_satellite_path row)</b> |     | <b>Landsat scene<br/>(year_month<br/>day_satellite_path row)</b> |
|-----|------------------------------------------------------------------|-----|------------------------------------------------------------------|
| 269 | LT05_20010218_173026                                             | 545 | LC08_20210414_173026                                             |
| 270 | LE07_20010330_173026                                             | 546 | LC08_20210430_173026                                             |
| 271 | LE07_20010415_173026                                             | 547 | LC08_20210516_173026                                             |
| 272 | LE07_20010501_173026                                             | 548 | LC08_20210601_173026                                             |
| 273 | LT05_20010509_173026                                             | 549 | LC08_20210617_173026                                             |
| 274 | LE07_20010517_173026                                             | 550 | LC08_20210703_173026                                             |
| 275 | LT05_20010525_173026                                             | 551 | LC08_20210719_173026                                             |
| 276 | LE07_20010704_173026                                             |     |                                                                  |

**Table S2.** RSD Landsat list of GIS project and acceptance sample.

| Landsat scene<br>(year_month<br>day_satellite_path row) |                        | Landsat scene<br>(year_month<br>day_satellite_path row) |                        |
|---------------------------------------------------------|------------------------|---------------------------------------------------------|------------------------|
| 1                                                       | y1985_0817_LT05_173026 | 68                                                      | y2002_0426_LT05_173026 |
| 2                                                       | y1985_1105_LT05_173026 | 69                                                      | y2002_0621_LE07_173026 |
| 3                                                       | y1986_0329_LT05_173026 | 70                                                      | y2003_0507_LE07_173026 |
| 4                                                       | y1986_0430_LT05_173026 | 71                                                      | y2003_0523_LE07_173026 |
| 5                                                       | y1986_0516_LT05_173026 | 72                                                      | y2004_0618_LT05_173026 |
| 6                                                       | y1986_0601_LT05_173026 | 73                                                      | y2005_0808_LT05_173026 |
| 7                                                       | y1986_1023_LT05_173026 | 74                                                      | y2005_0909_LT05_173026 |
| 8                                                       | y1987_0807_LT05_173026 | 75                                                      | y2005_0925_LT05_173026 |
| 9                                                       | y1987_1010_LT05_173026 | 76                                                      | y2006_0827_LT05_173026 |
| 10                                                      | y1987_1026_LT05_173026 | 77                                                      | y2006_0912_LT05_173026 |
| 11                                                      | y1988_0630_LT04_173026 | 78                                                      | y2006_0928_LT05_173026 |
| 12                                                      | y1988_0801_LT04_173026 | 79                                                      | y2007_0526_LT05_173026 |
| 13                                                      | y1988_0825_LT05_173026 | 80                                                      | y2007_0713_LT05_173026 |
| 14                                                      | y1988_1012_LT05_173026 | 81                                                      | y2007_1001_LT05_173026 |
| 15                                                      | y1988_1028_LT05_173026 | 82                                                      | y2009_0702_LT05_173026 |
| 16                                                      | y1989_0321_LT05_173026 | 83                                                      | y2010_0502_LT05_173026 |
| 17                                                      | y1989_0406_LT05_173026 | 84                                                      | y2010_0619_LT05_173026 |
| 18                                                      | y1989_0422_LT05_173026 | 85                                                      | y2010_0806_LT05_173026 |
| 19                                                      | y1989_0609_LT05_173026 | 86                                                      | y2010_0822_LT05_173026 |
| 20                                                      | y1989_0719_LT04_173026 | 87                                                      | y2010_0923_LT05_173026 |
| 21                                                      | y1989_0804_LT04_173026 | 88                                                      | y2010_1025_LT05_173026 |
| 22                                                      | y1989_0812_LT05_173026 | 89                                                      | y2011_0419_LT05_173026 |
| 23                                                      | y1989_0820_LT04_173026 | 90                                                      | y2011_0606_LT05_173026 |
| 24                                                      | y1989_0828_LT05_173026 | 91                                                      | y2011_0708_LT05_173026 |
| 25                                                      | y1989_1015_LT05_173026 | 92                                                      | y2011_0809_LT05_173026 |
| 26                                                      | y1990_0324_LT05_173026 | 93                                                      | y2013_0424_LC08_173026 |
| 27                                                      | y1990_0714_LT05_173026 | 94                                                      | y2013_0611_LC08_173026 |
| 28                                                      | y1990_0815_LT05_173026 | 95                                                      | y2013_0713_LC08_173026 |
| 29                                                      | y1991_0903_LT05_173026 | 96                                                      | y2013_1102_LC08_173026 |
| 30                                                      | y1991_1021_LT05_173026 | 97                                                      | y2014_0427_LC08_173026 |
| 31                                                      | y1992_0804_LT05_173026 | 98                                                      | y2014_0630_LC08_173026 |
| 32                                                      | y1992_0905_LT05_173026 | 99                                                      | y2014_0801_LC08_173026 |
| 33                                                      | y1993_0722_LT05_173026 | 100                                                     | y2014_0817_LC08_173026 |
| 34                                                      | y1993_0807_LT05_173026 | 101                                                     | y2014_0902_LC08_173026 |
| 35                                                      | y1993_0924_LT05_173026 | 102                                                     | y2014_0918_LC08_173026 |
| 36                                                      | y1993_1111_LT05_173026 | 103                                                     | y2014_1004_LC08_173026 |
| 37                                                      | y1994_0404_LT05_173026 | 104                                                     | y2014_1121_LC08_173026 |
| 38                                                      | y1995_0525_LT05_173026 | 105                                                     | y2015_0414_LC08_173026 |
| 39                                                      | y1995_0610_LT05_173026 | 106                                                     | y2015_0804_LC08_173026 |
| 40                                                      | y1995_0626_LT05_173026 | 107                                                     | y2015_0905_LC08_173026 |
| 41                                                      | y1995_0914_LT05_173026 | 108                                                     | y2016_1025_LC08_173026 |
| 42                                                      | y1995_1016_LT05_173026 | 109                                                     | y2017_0403_LC08_173026 |
| 43                                                      | y1996_0714_LT05_173026 | 110                                                     | y2017_0505_LC08_173026 |



| Landsat scene<br>(year_month<br>day_satellite_path row) |                        | Landsat scene<br>(year_month<br>day_satellite_path row) |                        |
|---------------------------------------------------------|------------------------|---------------------------------------------------------|------------------------|
| 44                                                      | y1996_0815_LT05_173026 | 111                                                     | y2017_0606_LC08_173026 |
| 45                                                      | y1996_1018_LT05_173026 | 112                                                     | y2017_0809_LC08_173026 |
| 46                                                      | y1997_0514_LT05_173026 | 113                                                     | y2017_0910_LC08_173026 |
| 47                                                      | y1998_0501_LT05_173026 | 114                                                     | y2018_0406_LC08_173026 |
| 48                                                      | y1998_0720_LT05_173026 | 115                                                     | y2018_0524_LC08_173026 |
| 49                                                      | y1998_0821_LT05_173026 | 116                                                     | y2018_0609_LC08_173026 |
| 50                                                      | y1998_1008_LT05_173026 | 117                                                     | y2018_0711_LC08_173026 |
| 51                                                      | y1999_0317_LT05_173026 | 118                                                     | y2018_0727_LC08_173026 |
| 52                                                      | y1999_0418_LT05_173026 | 119                                                     | y2018_0812_LC08_173026 |
| 53                                                      | y1999_0605_LT05_173026 | 120                                                     | y2018_0828_LC08_173026 |
| 54                                                      | y1999_0808_LT05_173026 | 121                                                     | y2018_0913_LC08_173026 |
| 55                                                      | y1999_0816_LE07_173026 | 122                                                     | y2018_1015_LC08_173026 |
| 56                                                      | y2000_0530_LE07_173026 | 123                                                     | y2019_0425_LC08_173026 |
| 57                                                      | y2000_0615_LE07_173026 | 124                                                     | y2019_0511_LC08_173026 |
| 58                                                      | y2000_0717_LE07_173026 | 125                                                     | y2019_0815_LC08_173026 |
| 59                                                      | y2000_0810_LT05_173026 | 126                                                     | y2019_0916_LC08_173026 |
| 60                                                      | y2000_1013_LT05_173026 | 127                                                     | y2020_0326_LC08_173026 |
| 61                                                      | y2001_0517_LE07_173026 | 128                                                     | y2020_0716_LC08_173026 |
| 62                                                      | y2001_0525_LT05_173026 | 129                                                     | y2020_0817_LC08_173026 |
| 63                                                      | y2001_0728_LT05_173026 | 130                                                     | y2020_0902_LC08_173026 |
| 64                                                      | y2001_0805_LE07_173026 | 131                                                     | y2020_0918_LC08_173026 |
| 65                                                      | y2001_0813_LT05_173026 | 132                                                     | y2021_0703_LC08_173026 |
| 66                                                      | y2001_0922_LE07_173026 | 133                                                     | y2021_0719_LC08_173026 |
| 67                                                      | y2002_0317_LE07_173026 |                                                         |                        |

**Table S4.** ANOVA of the difference between the means of  $BAND_{mean}$  values in soil varieties identified in field studies.

| Band  |                | Sum of Squares | df | Mean Square | F      | p-Value  | F Crit |
|-------|----------------|----------------|----|-------------|--------|----------|--------|
| BLUE  | Between groups | 0.0006         | 4  | 0.0002      | 62.42  | 4.08E-23 | 2.49   |
|       | Within groups  | 0.0002         | 75 | 0.0000      |        |          |        |
|       | Total          | 0.0008         | 79 |             |        |          |        |
| GREEN | Between groups | 0.0029         | 4  | 0.0007      | 97.66  | 5.95E-29 | 2.49   |
|       | Within groups  | 0.0006         | 75 | 0.0000      |        |          |        |
|       | Total          | 0.0035         | 79 |             |        |          |        |
| RED   | Between groups | 0.0073         | 4  | 0.0018      | 117.26 | 1.79E-31 | 2.49   |
|       | Within groups  | 0.0012         | 75 | 0.0000      |        |          |        |
|       | Total          | 0.0085         | 79 |             |        |          |        |
| NIR   | Between groups | 0.0127         | 4  | 0.0032      | 103.34 | 1.00E-29 | 2.49   |
|       | Within groups  | 0.0023         | 75 | 0.0000      |        |          |        |
|       | Total          | 0.0151         | 79 |             |        |          |        |
| SWIR1 | Between groups | 0.0053         | 4  | 0.0013      | 18.18  | 1.77E-10 | 2.49   |
|       | Within groups  | 0.0055         | 75 | 0.0001      |        |          |        |
|       | Total          | 0.0108         | 79 |             |        |          |        |
| SWIR2 | Between groups | 0.0019         | 4  | 0.0005      | 5.94   | 3.31E-04 | 2.49   |
|       | Within groups  | 0.0061         | 75 | 0.0001      |        |          |        |
|       | Total          | 0.0080         | 79 |             |        |          |        |

**Table S5.** Post hoc analysis of the means of  $BLUE_{mean}$  values in soil varieties identified in field studies (significant differences are shown in red).

| Soils | Approximate Probabilities ( $p$ -Values) for Post Hoc Test* |                    |                    |                    |                    |
|-------|-------------------------------------------------------------|--------------------|--------------------|--------------------|--------------------|
|       | 1                                                           | 2                  | 3                  | 4                  | 5                  |
|       | mean =<br>0.116581                                          | mean =<br>0.119266 | mean =<br>0.121197 | mean =<br>0.124211 | mean =<br>0.125866 |
| 1     |                                                             | 0.031345           | 0.000141           | 0.000123           | 0.000123           |
| 2     | 0.031345                                                    |                    | 0.001423           | 0.000123           | 0.000123           |
| 3     | 0.000141                                                    | 0.001423           |                    | 0.000164           | 0.000123           |
| 4     | 0.000123                                                    | 0.000123           | 0.000164           |                    | 0.081902           |
| 5     | 0.000123                                                    | 0.000123           | 0.000123           | 0.081902           |                    |

\* Error: Between groups MS = 0.00000, ds = 75.00.

**Table S6.** Post hoc analysis of the means of  $GREEN_{mean}$  values in soil varieties identified in field studies (significant differences are shown in red).

| Soils | Approximate Probabilities ( $p$ -Values) for Post Hoc Test* |                    |                    |                    |                    |
|-------|-------------------------------------------------------------|--------------------|--------------------|--------------------|--------------------|
|       | 1                                                           | 2                  | 3                  | 4                  | 5                  |
|       | mean =<br>0.094927                                          | mean =<br>0.100614 | mean =<br>0.105379 | mean =<br>0.111238 | mean =<br>0.115272 |
| 1     |                                                             | 0.004998           | 0.000123           | 0.000123           | 0.000123           |
| 2     | 0.004998                                                    |                    | 0.000125           | 0.000123           | 0.000123           |
| 3     | 0.000123                                                    | 0.000125           |                    | 0.000127           | 0.000123           |
| 4     | 0.000123                                                    | 0.000123           | 0.000127           |                    | 0.004817           |
| 5     | 0.000123                                                    | 0.000123           | 0.000123           | 0.004817           |                    |

\* Error: Between groups MS = 0.00001, ds = 75.00.

**Table S7.** Post hoc analysis of the means of  $RED_{mean}$  values in soil varieties identified in field studies (significant differences are shown in red).

| Soils | Approximate Probabilities ( $p$ -Values) for Post Hoc Test* |                    |                    |                    |                    |
|-------|-------------------------------------------------------------|--------------------|--------------------|--------------------|--------------------|
|       | 1                                                           | 2                  | 3                  | 4                  | 5                  |
|       | mean =<br>0.094050                                          | mean =<br>0.102074 | mean =<br>0.109684 | mean =<br>0.118826 | mean =<br>0.125839 |
| 1     |                                                             | 0.006516           | 0.000123           | 0.000123           | 0.000123           |
| 2     | 0.006516                                                    |                    | 0.000123           | 0.000123           | 0.000123           |
| 3     | 0.000123                                                    | 0.000123           |                    | 0.000123           | 0.000123           |
| 4     | 0.000123                                                    | 0.000123           | 0.000123           |                    | 0.000510           |
| 5     | 0.000123                                                    | 0.000123           | 0.000123           | 0.000510           |                    |

\* Error: Between groups MS = 0.00002, ds = 75.00.

**Table S8.** Post hoc analysis of the means of  $NIR_{mean}$  values in soil varieties identified in field studies (significant differences are shown in red).

| Soils | Approximate Probabilities ( $p$ -Values) for Post Hoc Test* |                    |                    |                    |                    |
|-------|-------------------------------------------------------------|--------------------|--------------------|--------------------|--------------------|
|       | 1                                                           | 2                  | 3                  | 4                  | 5                  |
|       | mean =<br>0.117476                                          | mean =<br>0.129261 | mean =<br>0.139674 | mean =<br>0.151499 | mean =<br>0.159972 |
| 1     |                                                             | 0.004044           | 0.000123           | 0.000123           | 0.000123           |
| 2     | 0.004044                                                    |                    | 0.000123           | 0.000123           | 0.000123           |
| 3     | 0.000123                                                    | 0.000123           |                    | 0.000127           | 0.000123           |
| 4     | 0.000123                                                    | 0.000123           | 0.000127           |                    | 0.003337           |
| 5     | 0.000123                                                    | 0.000123           | 0.000123           | 0.003337           |                    |

\* Error: Between groups MS = 0.00003, ds = 75.00.

**Table S9.** Post hoc analysis of the means of  $SWIRI_{mean}$  values in soil varieties identified in field studies (significant differences are shown in red).

| Soils | Approximate Probabilities ( $p$ -Values) for Post Hoc Test* |                    |                    |                    |                    |
|-------|-------------------------------------------------------------|--------------------|--------------------|--------------------|--------------------|
|       | 1                                                           | 2                  | 3                  | 4                  | 5                  |
|       | mean =<br>0.192582                                          | mean =<br>0.200126 | mean =<br>0.208639 | mean =<br>0.215285 | mean =<br>0.219198 |
| 1     |                                                             | 0.546471           | 0.014285           | 0.000266           | 0.000128           |
| 2     | 0.546471                                                    |                    | 0.015417           | 0.000317           | 0.000127           |
| 3     | 0.014285                                                    | 0.015417           |                    | 0.283641           | 0.027077           |
| 4     | 0.000266                                                    | 0.000317           | 0.283641           |                    | 0.794233           |
| 5     | 0.000128                                                    | 0.000127           | 0.027077           | 0.794233           |                    |

\* Error: Between groups MS = 0.00007, ds = 75.00.

**Table S10.** Post hoc analysis of the means of  $SWIR2_{mean}$  values in soil varieties identified in field studies (significant differences are shown in red).

| Soils | Approximate Probabilities ( <i>p</i> -Values) for Post Hoc Test* |                    |                    |                    |                    |
|-------|------------------------------------------------------------------|--------------------|--------------------|--------------------|--------------------|
|       | 1                                                                | 2                  | 3                  | 4                  | 5                  |
|       | mean =<br>0.170052                                               | mean =<br>0.174140 | mean =<br>0.180152 | mean =<br>0.183575 | mean =<br>0.185467 |
| 1     |                                                                  | 0.934333           | 0.306222           | 0.081413           | 0.032692           |
| 2     | 0.934333                                                         |                    | 0.206671           | 0.068879           | 0.023860           |
| 3     | 0.306222                                                         | 0.206671           |                    | 0.868967           | 0.602301           |
| 4     | 0.081413                                                         | 0.068879           | 0.868967           |                    | 0.985838           |
| 5     | 0.032692                                                         | 0.023860           | 0.602301           | 0.985838           |                    |

\* Error: Between groups MS = 0.00008, ds = 75.00.



**Table S11.** ANOVA of the difference between the means of OM content in  $BAND_{mean}$  classes for soil varieties.

| Band  |                | Sum of Squares | df | Mean Square | F      | p-Value  | F Crit |
|-------|----------------|----------------|----|-------------|--------|----------|--------|
| BLUE  | Between groups | 14.49          | 4  | 3.62        | 36.97  | 4.74E-17 | 2.49   |
|       | Within groups  | 7.35           | 75 | 0.10        |        |          |        |
|       | Total          | 21.84          | 79 |             |        |          |        |
| GREEN | Between groups | 18.38          | 4  | 4.60        | 99.75  | 3.07E-29 | 2.49   |
|       | Within groups  | 3.46           | 75 | 0.05        |        |          |        |
|       | Total          | 21.84          | 79 |             |        |          |        |
| RED   | Between groups | 17.82          | 4  | 4.46        | 83.15  | 8.52E-27 | 2.49   |
|       | Within groups  | 4.02           | 75 | 0.05        |        |          |        |
|       | Total          | 21.84          | 79 |             |        |          |        |
| NIR   | Between groups | 18.62          | 4  | 4.65        | 108.25 | 2.30E-30 | 2.49   |
|       | Within groups  | 3.22           | 75 | 0.04        |        |          |        |
|       | Total          | 21.84          | 79 |             |        |          |        |

**Table S12.** ANOVA of the difference between the means of thickness of humus horizon in *BAND<sub>mean</sub>* classes for soil varieties.

| Band  |                | Sum of Squares | df | Mean Square | F      | <i>p</i> -Value | F Crit |
|-------|----------------|----------------|----|-------------|--------|-----------------|--------|
| BLUE  | Between groups | 6536.60        | 4  | 1634.15     | 56.50  | 6.81E-22        | 2.49   |
|       | Within groups  | 2169.20        | 75 | 28.92       |        |                 |        |
|       | Total          | 8705.80        | 79 |             |        |                 |        |
| GREEN | Between groups | 7424.04        | 4  | 1856.01     | 108.60 | 2.08E-30        | 2.49   |
|       | Within groups  | 1281.76        | 75 | 17.09       |        |                 |        |
|       | Total          | 8705.80        | 79 |             |        |                 |        |
| RED   | Between groups | 7602.96        | 4  | 1900.74     | 129.26 | 7.58E-33        | 2.49   |
|       | Within groups  | 1102.84        | 75 | 14.70       |        |                 |        |
|       | Total          | 8705.80        | 79 |             |        |                 |        |
| NIR   | Between groups | 7452.09        | 4  | 1863.02     | 111.45 | 9.11E-31        | 2.49   |
|       | Within groups  | 1253.71        | 75 | 16.72       |        |                 |        |
|       | Total          | 8705.80        | 79 |             |        |                 |        |

**Table S13.** Post hoc analysis of the means of OM content in *BLUE<sub>mean</sub>* classes for soil varieties (significant differences are shown in red).

| Soils | Approximate Probabilities ( <i>p</i> -Values) for Post Hoc Test * |              |              |              |              |
|-------|-------------------------------------------------------------------|--------------|--------------|--------------|--------------|
|       | 1                                                                 | 2            | 3            | 4            | 5            |
|       | mean = 3.250                                                      | mean = 3.064 | mean = 2.616 | mean = 2.390 | mean = 1.960 |
| 1     |                                                                   | 0.756725     | 0.001237     | 0.000126     | 0.000123     |
| 2     | 0.756725                                                          |              | 0.000206     | 0.000186     | 0.000123     |
| 3     | 0.001237                                                          | 0.000206     |              | 0.493157     | 0.000124     |
| 4     | 0.000126                                                          | 0.000186     | 0.493157     |              | 0.024110     |
| 5     | 0.000123                                                          | 0.000123     | 0.000124     | 0.024110     |              |

\* Error: Between groups MS = 0.09799, ds = 75.00.

**Table S14.** Post hoc analysis of the means of OM content in *GREEN<sub>mean</sub>* classes for soil varieties (significant differences are shown in red).

| Soils | Approximate Probabilities ( <i>p</i> -Values) for Post Hoc Test * |              |              |              |              |
|-------|-------------------------------------------------------------------|--------------|--------------|--------------|--------------|
|       | 1                                                                 | 2            | 3            | 4            | 5            |
|       | mean = 3.314                                                      | mean = 3.063 | mean = 2.477 | mean = 2.250 | mean = 1.892 |
| 1     |                                                                   | 0.193207     | 0.000123     | 0.000123     | 0.000123     |
| 2     | 0.193207                                                          |              | 0.000123     | 0.000123     | 0.000123     |
| 3     | 0.000123                                                          | 0.000123     |              | 0.064233     | 0.000123     |
| 4     | 0.000123                                                          | 0.000123     | 0.064233     |              | 0.001099     |
| 5     | 0.000123                                                          | 0.000123     | 0.000123     | 0.001099     |              |

\* Error: Between groups MS = 0.04608, ds = 75.00.

**Table S15.** Post hoc analysis of the means of OM content in  $RED_{mean}$  classes for soil varieties (significant differences are shown in red).

| Soils | Approximate Probabilities ( $p$ -Values) for Post Hoc Test * |              |              |              |              |
|-------|--------------------------------------------------------------|--------------|--------------|--------------|--------------|
|       | 1                                                            | 2            | 3            | 4            | 5            |
|       | mean = 3.314                                                 | mean = 3.086 | mean = 2.581 | mean = 2.269 | mean = 1.915 |
| 1     |                                                              | 0.354805     | 0.000123     | 0.000123     | 0.000123     |
| 2     | 0.354805                                                     |              | 0.000123     | 0.000123     | 0.000123     |
| 3     | 0.000123                                                     | 0.000123     |              | 0.002597     | 0.000123     |
| 4     | 0.000123                                                     | 0.000123     | 0.002597     |              | 0.002067     |
| 5     | 0.000123                                                     | 0.000123     | 0.000123     | 0.002067     |              |

\* Error: Between groups MS = 0.05358, ds = 75.00.

**Table S16.** Post hoc analysis of the means of OM content in  $NIR_{mean}$  classes for soil varieties (significant differences are shown in red).

| Soils | Approximate Probabilities ( $p$ -Values) for Post Hoc Test * |              |              |              |              |
|-------|--------------------------------------------------------------|--------------|--------------|--------------|--------------|
|       | 1                                                            | 2            | 3            | 4            | 5            |
|       | mean = 3.314                                                 | mean = 3.072 | mean = 2.433 | mean = 2.258 | mean = 1.929 |
| 1     |                                                              | 0.195921     | 0.000123     | 0.000123     | 0.000123     |
| 2     | 0.195921                                                     |              | 0.000123     | 0.000123     | 0.000123     |
| 3     | 0.000123                                                     | 0.000123     |              | 0.245160     | 0.000123     |
| 4     | 0.000123                                                     | 0.000123     | 0.245160     |              | 0.002043     |
| 5     | 0.000123                                                     | 0.000123     | 0.000123     | 0.002043     |              |

\* Error: Between groups MS = 0.04299, ds = 75.00.

**Table S17.** Post hoc analysis of the means of thickness of humus horizon in *BLUE<sub>mean</sub>* classes for soil varieties (significant differences are shown in red).

| Soils | Approximate Probabilities ( <i>p</i> -Values) for Post Hoc Test * |              |              |              |              |
|-------|-------------------------------------------------------------------|--------------|--------------|--------------|--------------|
|       | 1                                                                 | 2            | 3            | 4            | 5            |
|       | mean = 54.88                                                      | mean = 45.14 | mean = 36.80 | mean = 31.40 | mean = 24.67 |
| 1     |                                                                   | 0.004786     | 0.000123     | 0.000123     | 0.000123     |
| 2     | 0.004786                                                          |              | 0.000139     | 0.000124     | 0.000123     |
| 3     | 0.000123                                                          | 0.000139     |              | 0.174803     | 0.000123     |
| 4     | 0.000123                                                          | 0.000124     | 0.174803     |              | 0.049552     |
| 5     | 0.000123                                                          | 0.000123     | 0.000123     | 0.049552     |              |

\* Error: Between groups MS = 28.923, ds = 75.00.

**Table S18.** Post hoc analysis of the means of thickness of humus horizon in *GREEN<sub>mean</sub>* classes for soil varieties (significant differences are shown in red).

| Soils | Approximate Probabilities ( <i>p</i> -Values) for Post Hoc Test * |              |              |              |              |
|-------|-------------------------------------------------------------------|--------------|--------------|--------------|--------------|
|       | 1                                                                 | 2            | 3            | 4            | 5            |
|       | mean = 56.86                                                      | mean = 44.19 | mean = 35.92 | mean = 29.81 | mean = 23.33 |
| 1     |                                                                   | 0.000124     | 0.000123     | 0.000123     | 0.000123     |
| 2     | 0.000124                                                          |              | 0.000142     | 0.000123     | 0.000123     |
| 3     | 0.000123                                                          | 0.000142     |              | 0.003034     | 0.000123     |
| 4     | 0.000123                                                          | 0.000123     | 0.003034     |              | 0.002436     |
| 5     | 0.000123                                                          | 0.000123     | 0.000123     | 0.002436     |              |

\* Error: Between groups MS = 17.090, ds = 75.00.



**Table S19.** Post hoc analysis of the means of thickness of humus horizon in  $RED_{mean}$  classes for soil varieties (significant differences are shown in red).

| Soils | Approximate Probabilities ( $p$ -Values) for Post Hoc Test * |              |              |              |              |
|-------|--------------------------------------------------------------|--------------|--------------|--------------|--------------|
|       | 1                                                            | 2            | 3            | 4            | 5            |
|       | mean = 56.86                                                 | mean = 44.96 | mean = 36.94 | mean = 30.25 | mean = 23.38 |
| 1     |                                                              | 0.000124     | 0.000123     | 0.000123     | 0.000123     |
| 2     | 0.000124                                                     |              | 0.000123     | 0.000123     | 0.000123     |
| 3     | 0.000123                                                     | 0.000123     |              | 0.000161     | 0.000123     |
| 4     | 0.000123                                                     | 0.000123     | 0.000161     |              | 0.000290     |
| 5     | 0.000123                                                     | 0.000123     | 0.000123     | 0.000290     |              |

\* Error: Between groups MS = 14.704, ds = 75.00.

**Table S20.** Post hoc analysis of the means of thickness of humus horizon in  $NIR_{mean}$  classes for soil varieties (significant differences are shown in red).

| Soils | Approximate Probabilities ( $p$ -Values) for Post Hoc Test * |              |              |              |              |
|-------|--------------------------------------------------------------|--------------|--------------|--------------|--------------|
|       | 1                                                            | 2            | 3            | 4            | 5            |
|       | mean = 56.86                                                 | mean = 44.38 | mean = 35.00 | mean = 29.50 | mean = 24.21 |
| 1     |                                                              | 0.000124     | 0.000123     | 0.000123     | 0.000123     |
| 2     | 0.000124                                                     |              | 0.000123     | 0.000123     | 0.000123     |
| 3     | 0.000123                                                     | 0.000123     |              | 0.012790     | 0.000123     |
| 4     | 0.000123                                                     | 0.000123     | 0.012790     |              | 0.018491     |
| 5     | 0.000123                                                     | 0.000123     | 0.000123     | 0.018491     |              |

\* Error: Between groups MS = 16.716, ds = 75.00.

**Table S21.** ANOVA of the difference between the means of  $BAND_{mean}$  values in degraded and non-degraded soils identified in field studies.

| Band  |                | Sum of Squares | df | Mean Square | F      | <i>p</i> -Value | F Crit |
|-------|----------------|----------------|----|-------------|--------|-----------------|--------|
| BLUE  | Between groups | 0.0004         | 1  | 0.0004      | 76.09  | 3.72E-13        | 3.96   |
|       | Within groups  | 0.0004         | 78 | 0.0000      |        |                 |        |
|       | Total          | 0.0008         | 79 |             |        |                 |        |
| GREEN | Between groups | 0.0020         | 1  | 0.0020      | 100.82 | 1.05E-15        | 3.96   |
|       | Within groups  | 0.0015         | 78 | 0.0000      |        |                 |        |
|       | Total          | 0.0035         | 79 |             |        |                 |        |
| RED   | Between groups | 0.0049         | 1  | 0.0049      | 106.69 | 2.95E-16        | 3.96   |
|       | Within groups  | 0.0036         | 78 | 0.0000      |        |                 |        |
|       | Total          | 0.0085         | 79 |             |        |                 |        |
| NIR   | Between groups | 0.0087         | 1  | 0.0087      | 107.57 | 2.45E-16        | 3.96   |
|       | Within groups  | 0.0063         | 78 | 0.0001      |        |                 |        |
|       | Total          | 0.0151         | 79 |             |        |                 |        |
| SWIR1 | Between groups | 0.0041         | 1  | 0.0041      | 47.88  | 1.12E-09        | 3.96   |
|       | Within groups  | 0.0067         | 78 | 0.0001      |        |                 |        |
|       | Total          | 0.0108         | 79 |             |        |                 |        |
| SWIR2 | Between groups | 0.0016         | 1  | 0.0016      | 19.60  | 3.06E-05        | 3.96   |
|       | Within groups  | 0.0064         | 78 | 0.0001      |        |                 |        |
|       | Total          | 0.0080         | 79 |             |        |                 |        |

**Table S22.** ANOVA of the difference between the means of OM content in  $BAND_{mean}$  classes for degraded and non-degraded soils.

| Band  |                | Sum of Squares | df | Mean Square | F      | <i>p</i> -Value | F Crit |
|-------|----------------|----------------|----|-------------|--------|-----------------|--------|
| BLUE  | Between groups | 10.25          | 1  | 10.25       | 68.97  | 2.41E-12        | 3.96   |
|       | Within groups  | 11.59          | 78 | 0.15        |        |                 |        |
|       | Total          | 21.84          | 79 |             |        |                 |        |
| GREEN | Between groups | 15.85          | 1  | 15.85       | 206.59 | 1.26E-23        | 3.96   |
|       | Within groups  | 5.99           | 78 | 0.08        |        |                 |        |
|       | Total          | 21.84          | 79 |             |        |                 |        |
| RED   | Between groups | 14.35          | 1  | 14.35       | 149.34 | 8.40E-20        | 3.96   |
|       | Within groups  | 7.49           | 78 | 0.10        |        |                 |        |
|       | Total          | 21.84          | 79 |             |        |                 |        |
| NIR   | Between groups | 16.39          | 1  | 16.39       | 234.75 | 3.12E-25        | 3.96   |
|       | Within groups  | 5.45           | 78 | 0.07        |        |                 |        |
|       | Total          | 21.84          | 79 |             |        |                 |        |
| SWIR1 | Between groups | 9.96           | 1  | 9.96        | 65.45  | 6.30E-12        | 3.96   |
|       | Within groups  | 11.88          | 78 | 0.15        |        |                 |        |
|       | Total          | 21.84          | 79 |             |        |                 |        |
| SWIR2 | Between groups | 7.32           | 1  | 7.32        | 39.34  | 1.84E-08        | 3.96   |
|       | Within groups  | 14.52          | 78 | 0.19        |        |                 |        |
|       | Total          | 21.84          | 79 |             |        |                 |        |

**Table S23.** ANOVA of the difference between the means of thickness of humus horizon in *BAND<sub>mean</sub>* classes for degraded and non-degraded soils.

| Band  |                | Sum of Squares | df | Mean Square | F      | <i>p</i> -Value | F Crit |
|-------|----------------|----------------|----|-------------|--------|-----------------|--------|
| BLUE  | Between groups | 4594.25        | 1  | 4594.25     | 87.16  | 2.41E-14        | 3.96   |
|       | Within groups  | 4111.55        | 78 | 52.71       |        |                 |        |
|       | Total          | 8705.80        | 79 |             |        |                 |        |
| GREEN | Between groups | 5512.99        | 1  | 5512.99     | 134.68 | 1.15E-18        | 3.96   |
|       | Within groups  | 3192.81        | 78 | 40.93       |        |                 |        |
|       | Total          | 8705.80        | 79 |             |        |                 |        |
| RED   | Between groups | 5489.60        | 1  | 5489.60     | 133.14 | 1.53E-18        | 3.96   |
|       | Within groups  | 3216.20        | 78 | 41.23       |        |                 |        |
|       | Total          | 8705.80        | 79 |             |        |                 |        |
| NIR   | Between groups | 5714.08        | 1  | 5714.08     | 148.98 | 8.94E-20        | 3.96   |
|       | Within groups  | 2991.72        | 78 | 38.36       |        |                 |        |
|       | Total          | 8705.80        | 79 |             |        |                 |        |
| SWIR1 | Between groups | 4176.54        | 1  | 4176.54     | 71.93  | 1.10E-12        | 3.96   |
|       | Within groups  | 4529.26        | 78 | 58.07       |        |                 |        |
|       | Total          | 8705.80        | 79 |             |        |                 |        |
| SWIR2 | Between groups | 3017.86        | 1  | 3017.86     | 41.38  | 9.24E-09        | 3.96   |
|       | Within groups  | 5687.94        | 78 | 72.92       |        |                 |        |
|       | Total          | 8705.80        | 79 |             |        |                 |        |
